# Supplementary material for: A disposable homemade screen printed electrode for famotidine analysis using a computer-designed molecularly imprinted polymer based on the MWCNT-Fe3O4 nanocomposite in simulated real samples
Source: Royal Society of Chemistry journal article supplement (doi:10.1039/d4ay01122h), 2024-01-01
Supplement: d4ay01122h7.pdf [file d4ay01122h7.pdf]

**Table S1.**

The experimental field definition for mixture design.

| <b>Component</b> | <b>Lower (-) <sup>a</sup></b> | <b>Upper (+) <sup>b</sup></b> |
|------------------|-------------------------------|-------------------------------|
| Graphite (%)     | 90                            | 99                            |
| PVC (%)          | 1                             | 10                            |
| NPOE (%)         | 0                             | 9                             |

<sup>a</sup> The lower amount of the each parameter

<sup>b</sup> The higher amount of the each parameter
