# Supplementary material for: A disposable homemade screen printed electrode for famotidine analysis using a computer-designed molecularly imprinted polymer based on the MWCNT-Fe3O4 nanocomposite in simulated real samples
Source: Royal Society of Chemistry journal article supplement (doi:10.1039/d4ay01122h), 2024-01-01
Supplement: d4ay01122h8.pdf [file d4ay01122h8.pdf]

**Table S2.**

The percentage composition of the carbon ink and its response.

| Run | Graphite (%) | PVC (%) | NPOE (%) | I ( $\mu\text{A}$ ) <sup>a</sup> |
|-----|--------------|---------|----------|----------------------------------|
| 1   | 90.0         | 1.0     | 9.0      | 5380                             |
| 2   | 93.0         | 4.0     | 3.0      | 928                              |
| 3   | 96.0         | 2.5     | 1.5      | 3380                             |
| 4   | 99.0         | 1.0     | 0.0      | 3830                             |
| 5   | 90.0         | 10.0    | 0.0      | 1000                             |
| 6   | 91.5         | 2.5     | 6.0      | 2080                             |
| 7   | 91.5         | 7.0     | 1.5      | 2550                             |

<sup>a</sup> The currents are average of three replicate experiments for each run.
