# Supplementary material for: A disposable homemade screen printed electrode for famotidine analysis using a computer-designed molecularly imprinted polymer based on the MWCNT-Fe3O4 nanocomposite in simulated real samples
Source: Royal Society of Chemistry journal article supplement (doi:10.1039/d4ay01122h), 2024-01-01
Supplement: d4ay01122h9.pdf [file d4ay01122h9.pdf]

**Table S3.**

Analysis of variance for the response.

| <b>Source</b>         | <b>DF</b> | <b>Seq SS</b> | <b>Adj SS</b> | <b>Adj MS</b> | <b>F-Value</b> | <b>P-Value</b> |
|-----------------------|-----------|---------------|---------------|---------------|----------------|----------------|
| Regression            | 5         | 15346127      | 15346127      | 3069225       | 836.11         | 0.026          |
| Linear                | 2         | 7605613       | 5378677       | 2689339       | 732.62         | 0.026          |
| Quadratic             | 1         | 4584801       | 346116        | 346116        | 94.29          | 0.065          |
| Graphite*NPOE         | 1         | 4584801       | 346116        | 346116        | 94.29          | 0.065          |
| Special Quartic       | 1         | 641           | 1793257       | 1793257       | 488.51         | 0.029          |
| Graphite*PVC*PVC*NPOE | 1         | 641           | 1793257       | 1793257       | 488.51         | 0.029          |
| Full Quartic1         | 1         | 3155072       | 3155072       | 3155072       | 859.50         | 0.022          |
| PVC*NPOE*(-)2         | 1         | 3155072       | 3155072       | 3155072       | 859.50         | 0.022          |
| Residual Error        | 1         | 3671          | 3671          | 3671          |                |                |
| Total                 | 6         | 15349798      |               |               |                |                |
