# Supplementary material for: A disposable homemade screen printed electrode for famotidine analysis using a computer-designed molecularly imprinted polymer based on the MWCNT-Fe3O4 nanocomposite in simulated real samples
Source: Royal Society of Chemistry journal article supplement (doi:10.1039/d4ay01122h), 2024-01-01
Supplement: d4ay01122h10.pdf [file d4ay01122h10.pdf]

**Table S4.**

Level of independent variables selected in Plackett-Burman design.

| <b>Variable</b>                                               | <b>Symbol</b> | <b>Low</b> | <b>High</b> |
|---------------------------------------------------------------|---------------|------------|-------------|
| Concentration of MWCNT@Fe <sub>3</sub> O <sub>4</sub> (mg/ml) | A             | 0.3        | 5.5         |
| Deposition time of MWCNT@Fe <sub>3</sub> O <sub>4</sub> (s)   | B             | 400        | 1600        |
| [PY]/[FAM]                                                    | C             | 10         | 50          |
| Scan rate (mV/s)                                              | D             | 50         | 100         |
| Number of scan                                                | E             | 5          | 10          |
| Stirring rate of loading solution (rpm)                       | F             | 400        | 900         |
| pH of buffer solution                                         | G             | 4          | 8           |
| Loading time (min)                                            | H             | 5          | 15          |
