# Supplementary material for: A disposable homemade screen printed electrode for famotidine analysis using a computer-designed molecularly imprinted polymer based on the MWCNT-Fe3O4 nanocomposite in simulated real samples
Source: Royal Society of Chemistry journal article supplement (doi:10.1039/d4ay01122h), 2024-01-01
Supplement: d4ay01122h11.pdf [file d4ay01122h11.pdf]

**Table S5.**

Plackett-Burman design experimental runs.

| <b>Run order</b> | <b>A</b> | <b>B</b> | <b>C</b> | <b>D</b> | <b>E</b> | <b>F</b> | <b>G</b> | <b>H</b> | <b>Current (<math>\mu\text{A}</math>)</b> |
|------------------|----------|----------|----------|----------|----------|----------|----------|----------|-------------------------------------------|
| 1                | 5.5      | 1600     | 10       | 100      | 10       | 400      | 8        | 5        | 9.326                                     |
| 2                | 0.3      | 1600     | 50       | 100      | 5        | 900      | 8        | 5        | 70.380                                    |
| 3                | 5.5      | 400      | 50       | 50       | 5        | 400      | 8        | 15       | 115.000                                   |
| 4                | 5.5      | 1600     | 10       | 100      | 5        | 400      | 4        | 15       | 4.410                                     |
| 5                | 5.5      | 1600     | 50       | 50       | 10       | 900      | 4        | 15       | 0.460                                     |
| 6                | 0.3      | 400      | 10       | 100      | 10       | 900      | 4        | 15       | 89.100                                    |
| 7                | 0.3      | 400      | 50       | 100      | 10       | 400      | 8        | 15       | 174.500                                   |
| 8                | 0.3      | 1600     | 50       | 50       | 10       | 400      | 4        | 5        | 3.090                                     |
| 9                | 0.3      | 1600     | 10       | 50       | 5        | 900      | 8        | 15       | 98.000                                    |
| 10               | 5.5      | 400      | 50       | 100      | 5        | 900      | 4        | 5        | 38.930                                    |
| 11               | 5.5      | 400      | 10       | 50       | 10       | 900      | 8        | 5        | 62.760                                    |
| 12               | 0.3      | 400      | 10       | 50       | 5        | 400      | 4        | 5        | 3.290                                     |
