# Supplementary material for: A disposable homemade screen printed electrode for famotidine analysis using a computer-designed molecularly imprinted polymer based on the MWCNT-Fe3O4 nanocomposite in simulated real samples
Source: Royal Society of Chemistry journal article supplement (doi:10.1039/d4ay01122h), 2024-01-01
Supplement: d4ay01122h12.pdf [file d4ay01122h12.pdf]

**Table S6.**

Experimental ranges and levels of the independent parameters studied in CCD

| <b>Factor Name</b>                                      | <b>Symbol</b> | <b>Low</b> | <b>High</b> |
|---------------------------------------------------------|---------------|------------|-------------|
| pH of buffer solution                                   | G             | 7          | 9           |
| Deposition time of MWCNT@Fe <sub>3</sub> O <sub>4</sub> | B             | 300        | 500         |
| Loading time                                            | H             | 1          | 20          |
| Concentration of MWCNT@Fe <sub>3</sub> O <sub>4</sub>   | A             | 0.2        | 0.4         |
