# Supplementary material for: A disposable homemade screen printed electrode for famotidine analysis using a computer-designed molecularly imprinted polymer based on the MWCNT-Fe3O4 nanocomposite in simulated real samples
Source: Royal Society of Chemistry journal article supplement (doi:10.1039/d4ay01122h), 2024-01-01
Supplement: d4ay01122h13.pdf [file d4ay01122h13.pdf]

**Table S7.**

Analysis of variance (ANOVA) for quadratic model fitting the experimental results of CCD

| <b>Source</b>     | <b>DF</b> | <b>Adj SS</b> | <b>Adj MS</b> | <b>F-Value</b> | <b>P-Value</b> |
|-------------------|-----------|---------------|---------------|----------------|----------------|
| Model             | 14        | 44.2263       | 3.1590        | 231.89         | 0.000          |
| Linear            | 4         | 12.8915       | 3.2229        | 236.58         | 0.000          |
| G                 | 1         | 1.6391        | 1.6391        | 120.32         | 0.000          |
| B                 | 1         | 1.4289        | 1.4289        | 104.89         | 0.000          |
| H                 | 1         | 1.9597        | 1.9597        | 143.85         | 0.000          |
| A                 | 1         | 7.8639        | 7.8639        | 577.26         | 0.000          |
| Square            | 4         | 4.3444        | 1.0861        | 79.73          | 0.000          |
| G*G               | 1         | 0.7515        | 0.7515        | 55.17          | 0.000          |
| B*B               | 1         | 0.2740        | 0.2740        | 20.11          | 0.000          |
| H*H               | 1         | 2.8625        | 2.8625        | 210.12         | 0.000          |
| A*A               | 1         | 0.0845        | 0.0845        | 6.20           | 0.024          |
| 2-Way Interaction | 6         | 26.9904       | 4.4984        | 330.22         | 0.000          |
| G*B               | 1         | 0.4303        | 0.4303        | 31.59          | 0.000          |
| G*H               | 1         | 16.8962       | 16.8962       | 1240.30        | 0.000          |
| G*A               | 1         | 0.0352        | 0.0352        | 2.58           | 0.128          |
| B*H               | 1         | 1.0847        | 1.0847        | 79.63          | 0.000          |
| B*A               | 1         | 0.9264        | 0.9264        | 68.00          | 0.000          |
| H*A               | 1         | 7.6176        | 7.6176        | 559.19         | 0.000          |
| Error             | 16        | 0.2180        | 0.0136        |                |                |
| Lack-of-Fit       | 10        | 0.1399        | 0.0140        | 1.07           | 0.487          |
| Pure Error        | 6         | 0.0781        | 0.0130        |                |                |
| Total             | 30        | 44.4443       |               |                |                |
