# Supplementary figures and images for: A disposable homemade screen printed electrode for famotidine analysis using a computer-designed molecularly imprinted polymer based on the MWCNT-Fe3O4 nanocomposite in simulated real samples
Source: Royal Society of Chemistry journal article supplement (doi:10.1039/d4ay01122h), 2024-01-01

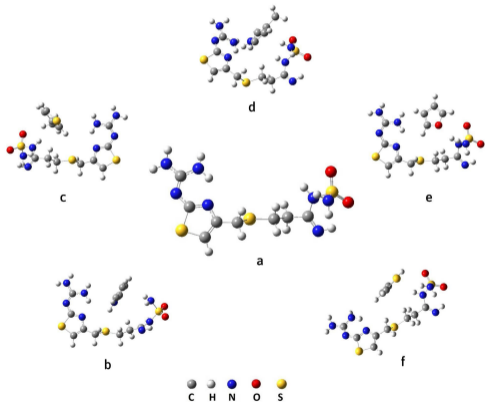

Supplement: d4ay01122h2.pdf [file d4ay01122h2.pdf]

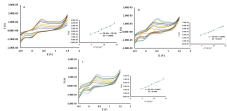

Supplement: d4ay01122h3.pdf [file d4ay01122h3.pdf]

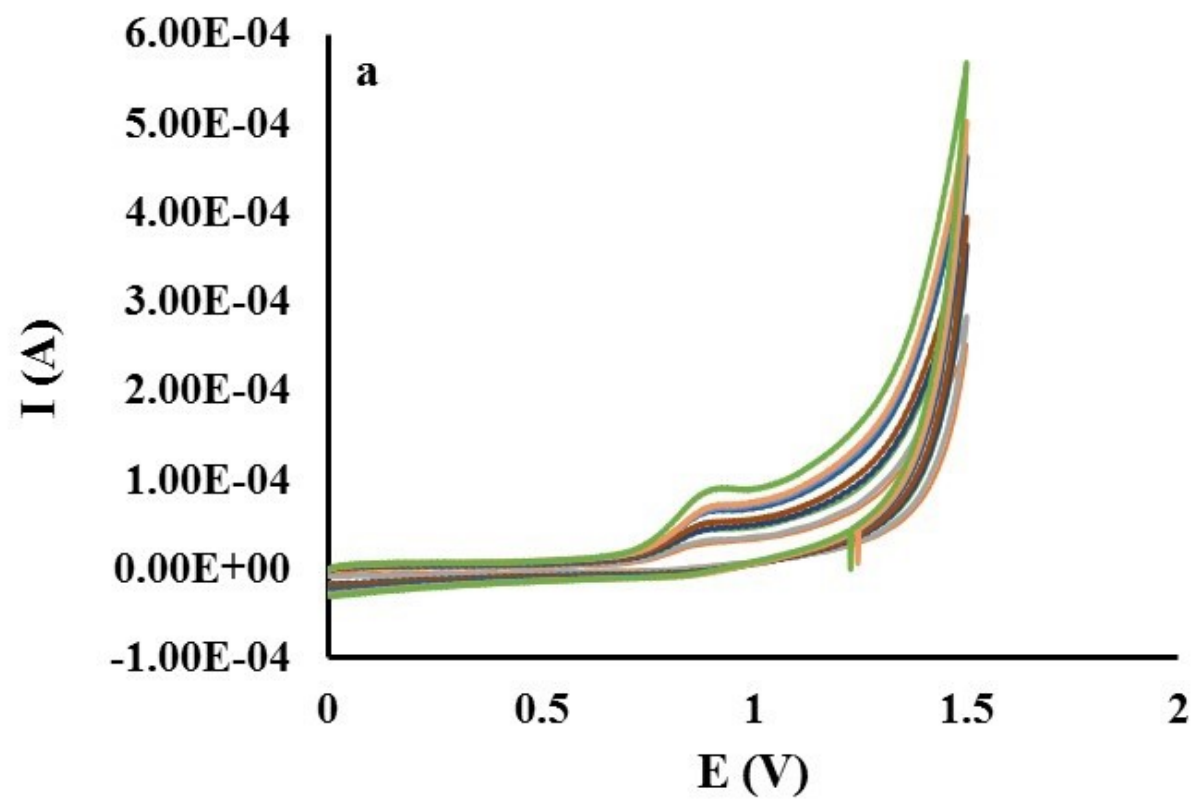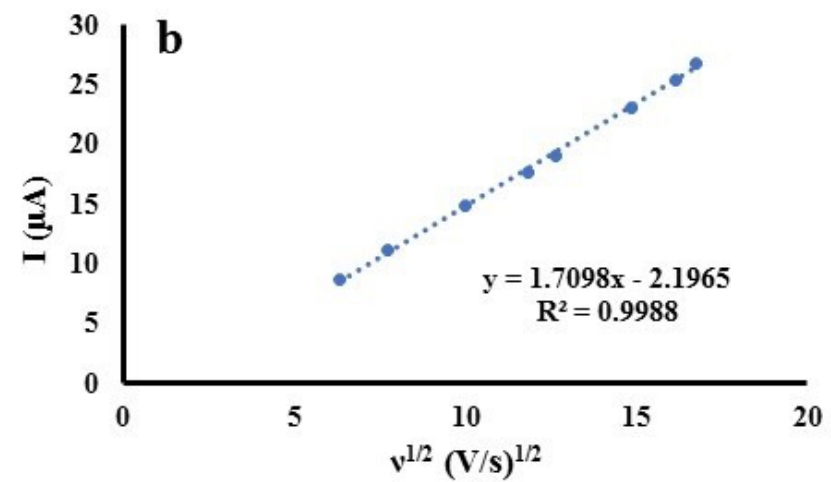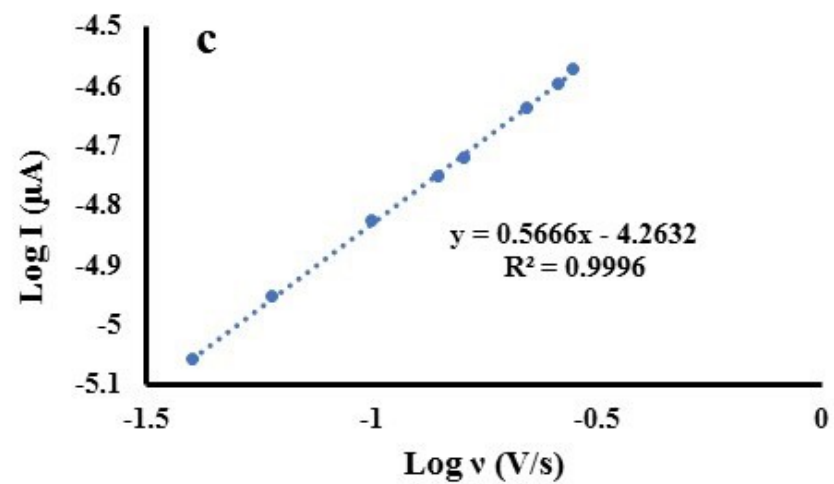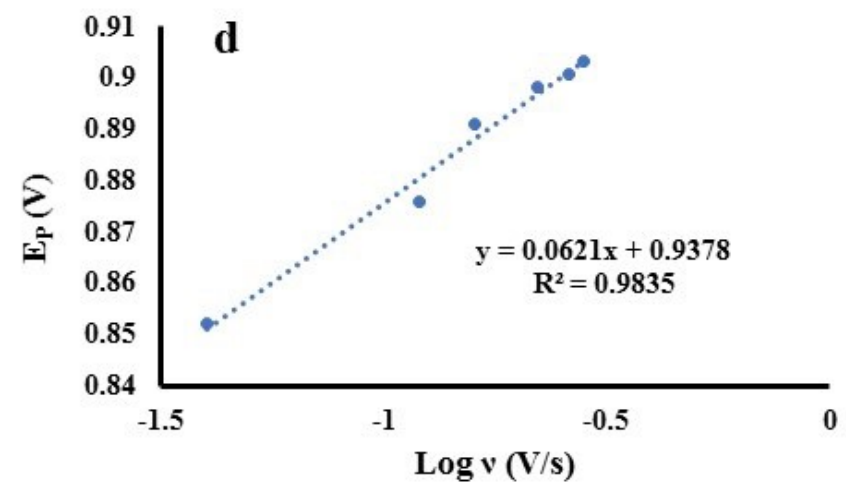

Supplement: d4ay01122h4.pdf [file d4ay01122h4.pdf]

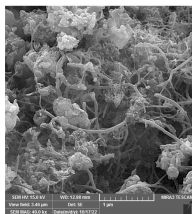

a

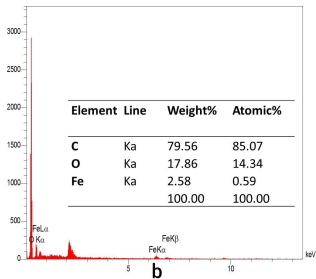

b

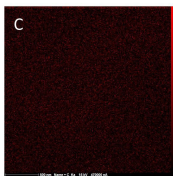

c

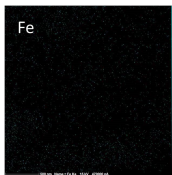

d

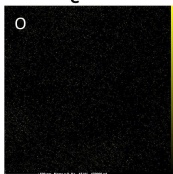

e

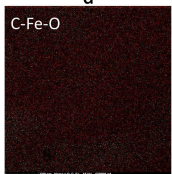

f

Supplement: d4ay01122h5.pdf [file d4ay01122h5.pdf]

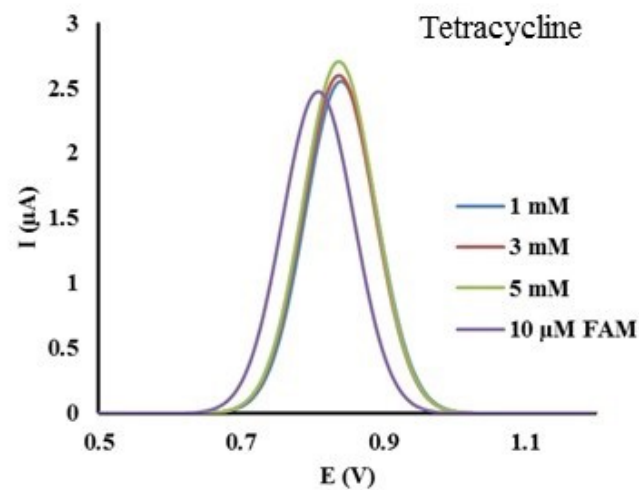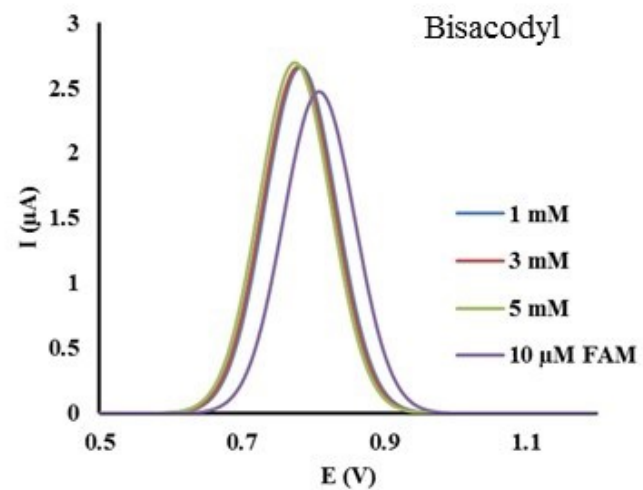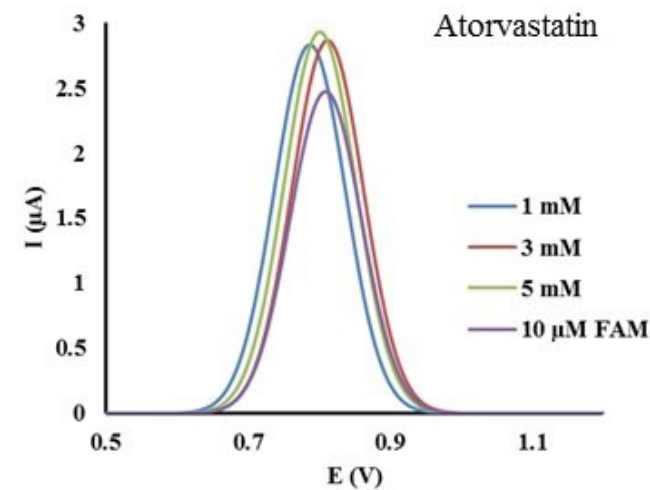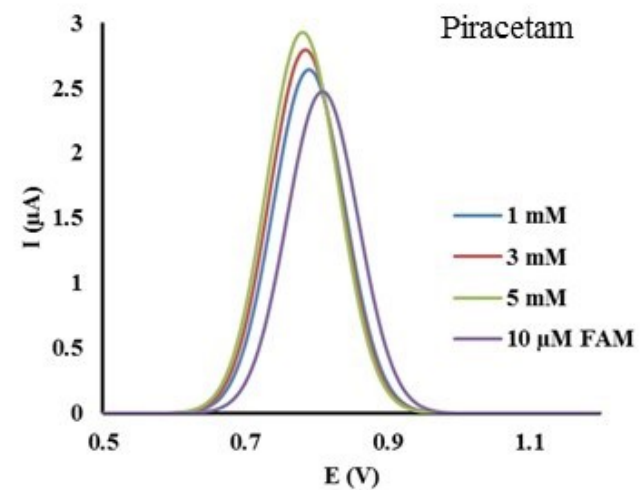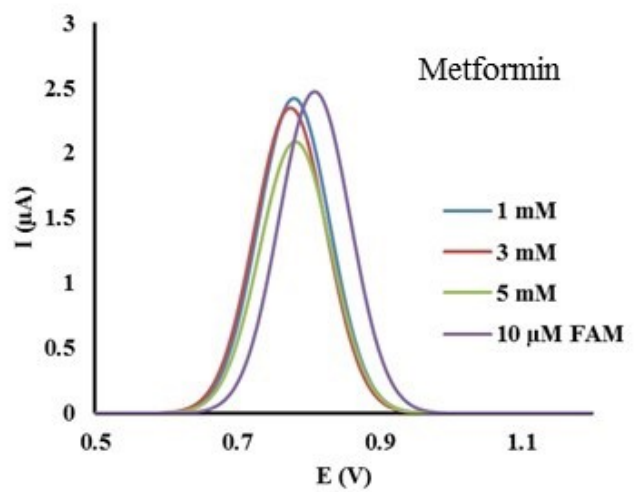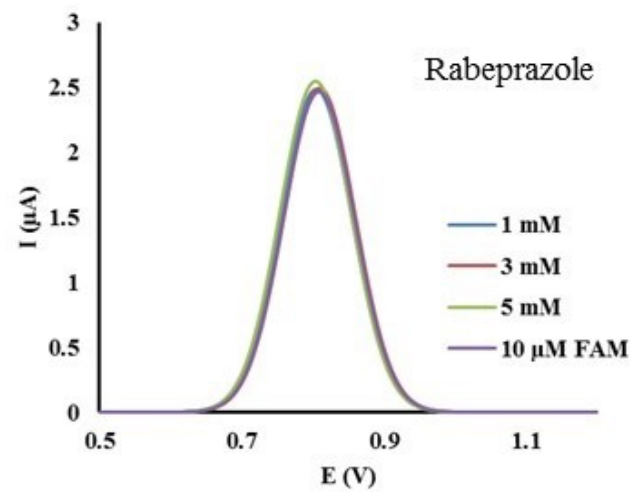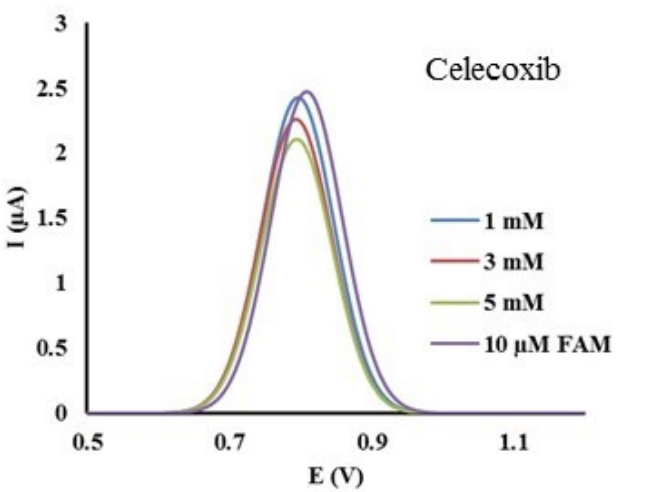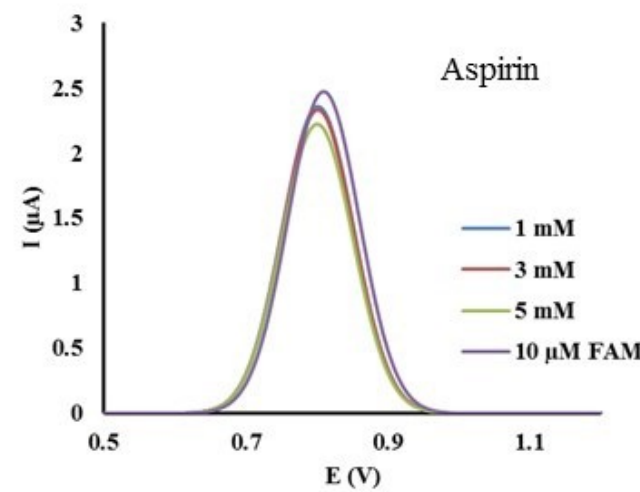

Supplement: d4ay01122h6.pdf [file d4ay01122h6.pdf]
